# Supplementary material for: Modification of Ti3C2Tx MXene with hyperbranched polyethylene ionomers: stable dispersions in nonpolar/low-polarity organic solvents, oxidation protection, and potential application in supercapacitors
Source: Royal Society of Chemistry journal article supplement (doi:10.1039/d3ta02936k), 2023-01-01
Supplement: d3ta02936k1.pdf [file d3ta02936k1.pdf]

Supporting Information

For

**Modification of  $Ti_3C_2T_x$  MXene with Hyperbranched Polyethylene Ionomers:  
Stable Dispersions in Nonpolar/Low-Polarity Organic Solvents, Oxidation Protection,  
and Potential Application In Supercapacitors**

*Bahareh Raisi,<sup>1</sup> Lingqi Huang,<sup>2</sup> Zhibin Ye<sup>1,\*</sup>*

1. Department of Chemical and Materials Engineering, Concordia University, Montreal, Quebec H3G 1M8, Canada
2. School of Engineering, Laurentian University, Sudbury, Ontario P3E 2C6, Canada

\* Corresponding author; email: [zhibin.ye@concordia.ca](mailto:zhibin.ye@concordia.ca)

**Table of Content (Total 10 pages, 2 tables, and 6 figures)**

**Figure S1.**  $^1H$  NMR spectra of the quaternary ammonium-containing hyperbranched polyethylene ionomers (I1–I5) and a nonionic hyperbranched ethylene homopolymer

**Figure S2.** TGA curve of dried unmodified MXene and MXene modified with a nonionic hyperbranched ethylene homopolymer (HBPE)

**Figure S3.** Water contact angle measurements on films of  $Ti_3C_2T_x$ –MXene and I-MXene-4-2

**Figure S4.**  $\zeta$  potential results of MXene and I-MXene-4-2 in different solvents after 100 days

**Table S1.** Physical-chemical properties of solvents used in this study

**Table S2.** Hansen and Hildebrand solubility parameters of the solvents used in this study.

**Figure S5.** Photos of the dispersion of unmodified delaminated MXene in water in a closed vial after 30 days (a) and in an open vial after 20 days (b); (c) photo of a stable colloidal dispersion of delaminated I-MXene-4-2 in THF in an open vial after 30 days.

**Figure S6.** (a) CV curves of MXene device at different scan rates; (b) GCD curves of MXene device at various current densities.

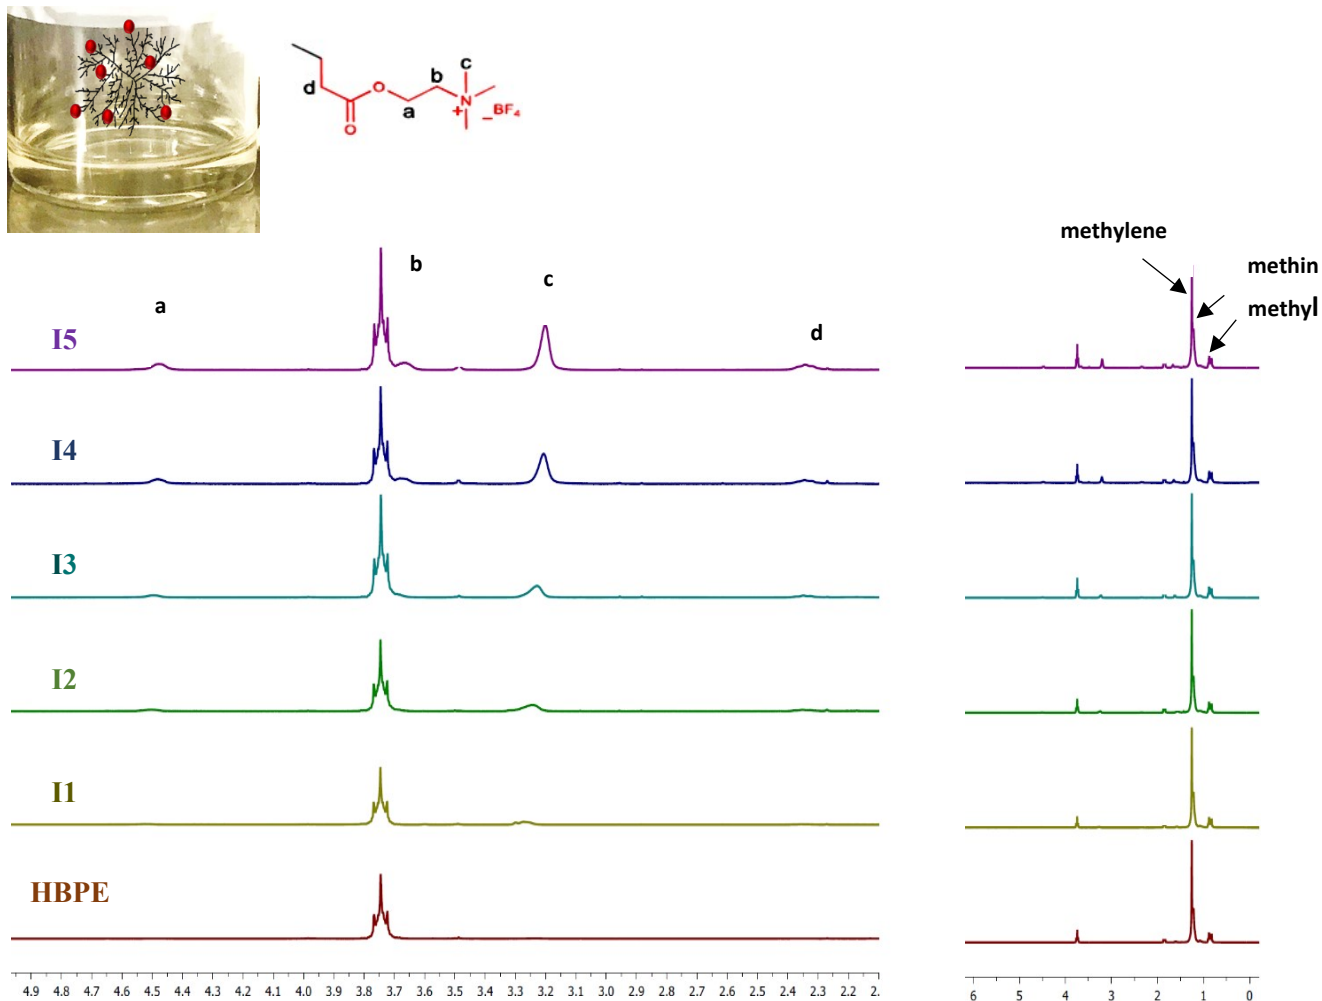

**Figure S1.** <sup>1</sup>H NMR spectra of the quaternary ammonium-containing hyperbranched polyethylene ionomers (I1–I5) and a nonionic hyperbranched polyethylene homopolymer.

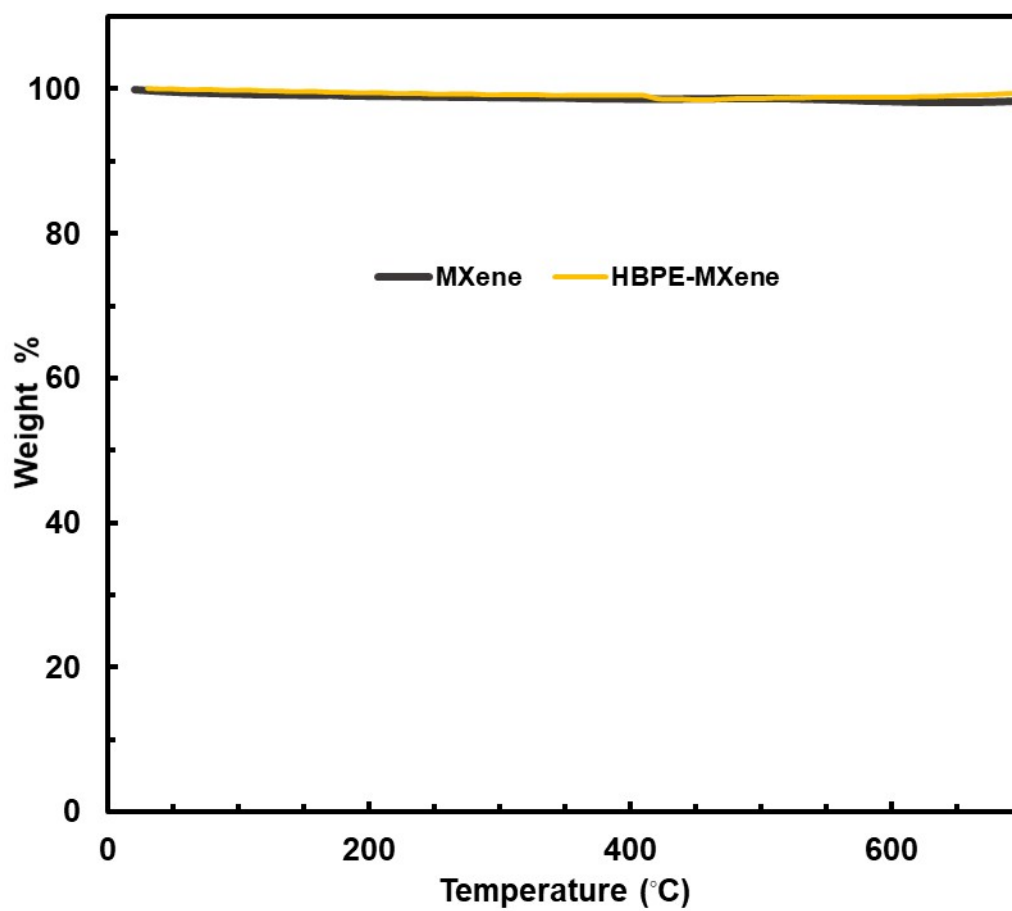

**Figure S2.** TGA curves of dried unmodified MXene and MXene modified with a nonionic hyperbranched ethylene homopolymer (HBPE).

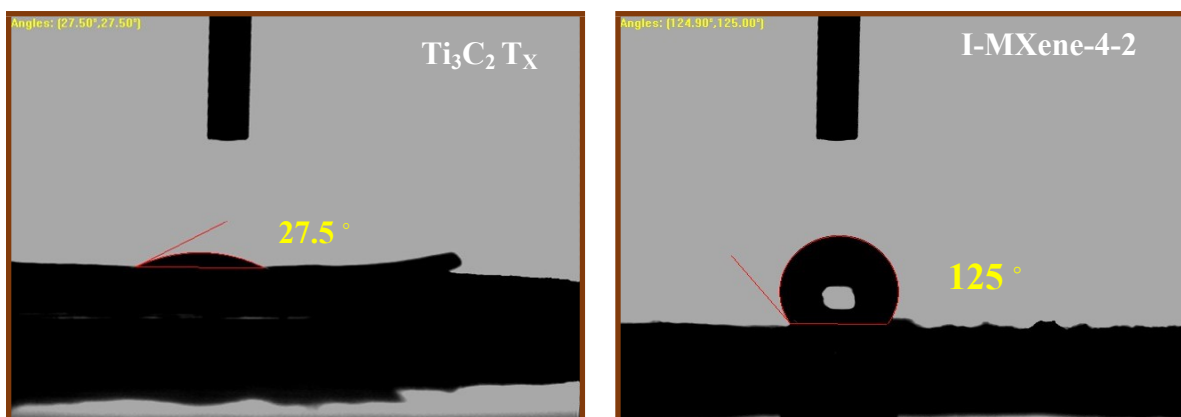

**Figure S3.** Water contact angle measurements on films of  $\text{Ti}_3\text{C}_2\text{T}_x$  MXene and I-MXene-4-2.

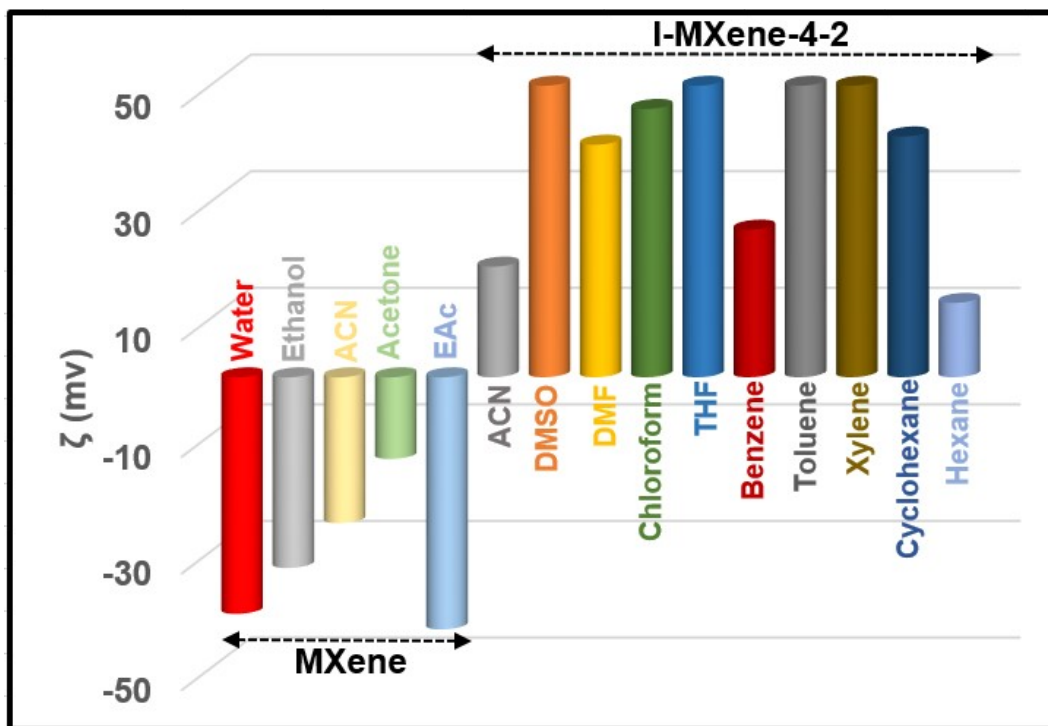

**Figure S4.**  $\zeta$  potential results of MXene and I-MXene-4-2 in different solvents after 100 days.

**Table S1. Physical-chemical properties of solvents used in this study**<sup>1,2</sup>

| Solvent       | Formula                                      | Boiling Point (°C) | Density (g/mL) (at 20°C) | Solubility in H <sub>2</sub> O <sup>a</sup> (g/100mg) | Relative Polarity <sup>b</sup> | Refractive index (at 20°C) | Viscosity (cP) (at 25°C) | Dielectric Constant |
|---------------|----------------------------------------------|--------------------|--------------------------|-------------------------------------------------------|--------------------------------|----------------------------|--------------------------|---------------------|
| Water         | H <sub>2</sub> O                             | 100                | 0.998                    | M                                                     | <b>1</b>                       | 1.333                      | 0.891                    | 80.1                |
| Methanol      | CH <sub>4</sub> O                            | 64.6               | 0.791                    | M                                                     | <b>0.762</b>                   | 1.329                      | 0.544                    | 32.7                |
| Ethanol       | C <sub>2</sub> H <sub>6</sub> O              | 78.5               | 0.789                    | M                                                     | <b>0.654</b>                   | 1.36                       | 1.04                     | 24.5                |
| Acetonitrile  | C <sub>2</sub> H <sub>3</sub> N              | 81.6               | 0.786                    | M                                                     | <b>0.460</b>                   | 1.344                      | 0.369                    | 36.64               |
| DMSO          | C <sub>2</sub> H <sub>6</sub> OS             | 189                | 1.092                    | M                                                     | <b>0.444</b>                   | 1.479                      | 1.987                    | 47.24               |
| DMF           | C <sub>3</sub> H <sub>7</sub> NO             | 153                | 0.994                    | M                                                     | <b>0.386</b>                   | 1.4305                     | 0.92                     | 36.7                |
| Acetone       | C <sub>3</sub> H <sub>6</sub> O              | 56.2               | 0.786                    | M                                                     | <b>0.355</b>                   | 1.359                      | 0.306                    | 21.01               |
| Pyridine      | C <sub>5</sub> H <sub>5</sub> N              | 115.5              | 0.982                    | M                                                     | <b>0.302</b>                   | 1.5093                     | 0.88                     | 12.4                |
| Chloroform    | CHCl <sub>3</sub>                            | 61.2               | 1.498                    | 0.8                                                   | <b>0.259</b>                   | 1.445                      | 0.537                    | 4.81                |
| Ethyl acetate | C <sub>4</sub> H <sub>8</sub> O <sub>2</sub> | 77.1               | 0.902                    | 8.7                                                   | <b>0.228</b>                   | 1.372                      | 0.423                    | 6.08                |
| THF           | C <sub>4</sub> H <sub>8</sub> O              | 66                 | 0.886                    | 30                                                    | <b>0.207</b>                   | 1.407                      | 0.456                    | 7.52                |
| Benzene       | C <sub>6</sub> H <sub>6</sub>                | 80.1               | 0.879                    | 0.18                                                  | <b>0.111</b>                   | 1.501                      | 0.603                    | 2.28                |
| Toluene       | C <sub>7</sub> H <sub>8</sub>                | 110.6              | 0.867                    | 0.05                                                  | <b>0.099</b>                   | 1.496                      | 0.560                    | 2.38                |
| Xylene        | C <sub>8</sub> H <sub>10</sub>               | 138.5              | 0.864                    | 0.02                                                  | <b>0.074</b>                   | 1.497                      | 0.59                     | 2.57                |
| Hexane        | C <sub>6</sub> H <sub>14</sub>               | 69                 | 0.655                    | 0.0014                                                | <b>0.009</b>                   | 1.375                      | 0.300                    | 1.89                |
| Cyclohexane   | C <sub>6</sub> H <sub>12</sub>               | 80.7               | 0.779                    | 0.005                                                 | <b>0.006</b>                   | 1.4262                     | 0.9                      | 2.02                |

<sup>a</sup> M indicates miscible.

<sup>b</sup> The values for relative polarity extracted from *Christian Reichardt, Solvents and Solvent Effects in Organic Chemistry*, Wiley-VCH Publishers, 3rd ed., **2003**.

**Table S2. Hansen <sup>3,4</sup> and Hildebrand solubility <sup>4</sup> parameters of the solvents used in this study.**

| Solvent       | Formula                                      | $\Delta d^a$<br>(MPa <sup>1/2</sup> ) | $\delta p^b$ | $\delta h^c$ | Hildebrand<br>(MPa <sup>1/2</sup> ) | Hydrogen-<br>bonding<br>capability |
|---------------|----------------------------------------------|---------------------------------------|--------------|--------------|-------------------------------------|------------------------------------|
| Water         | H <sub>2</sub> O                             | 15.5                                  | 16           | 42.3         | 47.9                                | strong                             |
| Methanol      | CH <sub>4</sub> O                            | 15.1                                  | 12.3         | 22.3         | 29.6                                | strong                             |
| Ethanol       | C <sub>2</sub> H <sub>6</sub> O              | 15.8                                  | 8.8          | 19.4         | 26                                  | strong                             |
| Acetonitrile  | C <sub>2</sub> H <sub>3</sub> N              | 15.3                                  | 18           | 6.1          | 24.3                                | poor                               |
| DMSO          | C <sub>2</sub> H <sub>6</sub> OS             | 18.4                                  | 16.4         | 10.2         | 24.5                                | moderate                           |
| DMF           | C <sub>3</sub> H <sub>7</sub> NO             | 17.4                                  | 13.7         | 11.3         | 24.8                                | moderate                           |
| Acetone       | C <sub>3</sub> H <sub>6</sub> O              | 15.5                                  | 10.4         | 7            | 20.2                                | moderate                           |
| Pyridine      | C <sub>5</sub> H <sub>5</sub> N              | 19                                    | 8.8          | 5.9          | 21.9                                | strong                             |
| Chloroform    | CHCl <sub>3</sub>                            | 17.8                                  | 3.1          | 5.7          | 19                                  | poor                               |
| Ethyl acetate | C <sub>4</sub> H <sub>8</sub> O <sub>2</sub> | 15.8                                  | 5.3          | 7.2          | 18.1                                | moderate                           |
| THF           | C <sub>4</sub> H <sub>8</sub> O              | 16.8                                  | 5.7          | 8            | 18.6                                | moderate                           |
| Benzene       | C <sub>6</sub> H <sub>6</sub>                | 18.4                                  | 0            | 2            | 18.8                                | poor                               |
| Toluene       | C <sub>7</sub> H <sub>8</sub>                | 18                                    | 1.4          | 2            | 18.2                                | poor                               |
| Xylene        | C <sub>8</sub> H <sub>10</sub>               | 17.6                                  | 1            | 3.1          | 18                                  | poor                               |
| Hexane        | C <sub>6</sub> H <sub>14</sub>               | 14.9                                  | 0            | 0            | 14.9                                | poor                               |
| Cyclohexane   | C <sub>6</sub> H <sub>12</sub>               | 16.8                                  | 0            | 0.2          | 16.8                                | poor                               |

<sup>a</sup> Dispersive

<sup>b</sup> Polar

<sup>c</sup> H-bond

Polypropylene and polyethylene have  $\delta D=18$ ,  $\delta P=0$ ,  $\delta H=1$ , and  $\delta D=16.9$ ,  $\delta P=0.8$ ,  $\delta H=2.8$  respectively. <sup>3,4</sup>

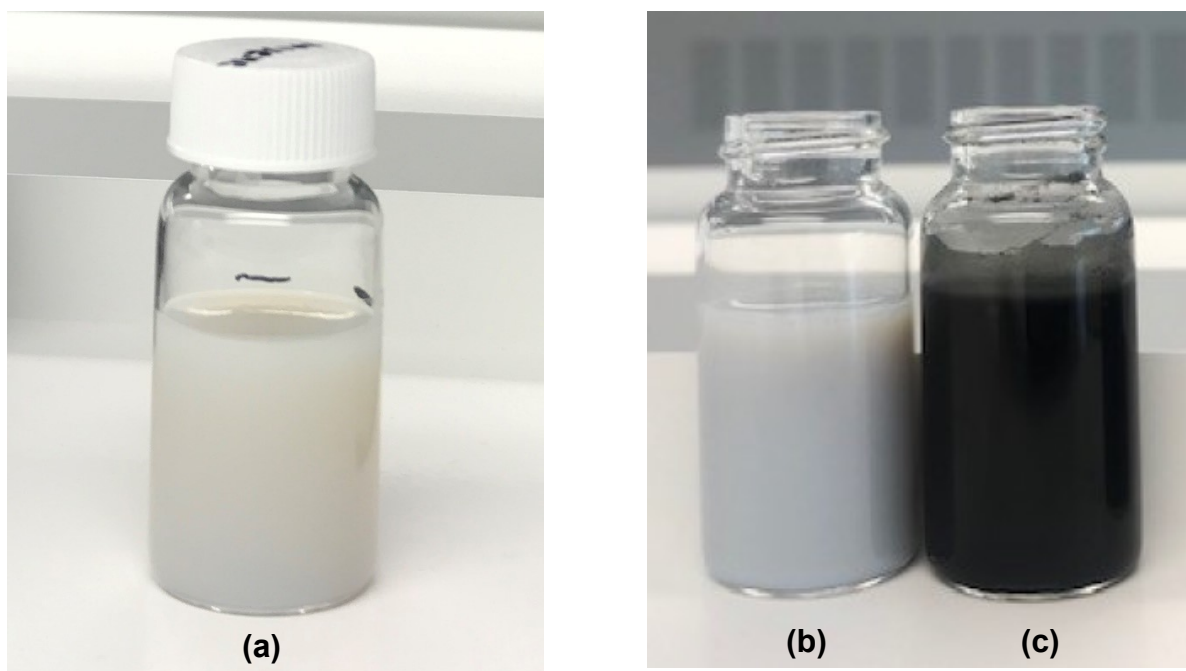

**Figure S5.** Photos of the dispersion of unmodified delaminated MXene in water in a closed vial after 30 days (a) and in an open vial after 20 days (b); (c) photo of a stable colloidal dispersion of delaminated I-MXene-4-2 in THF in an open vial after 30 days.



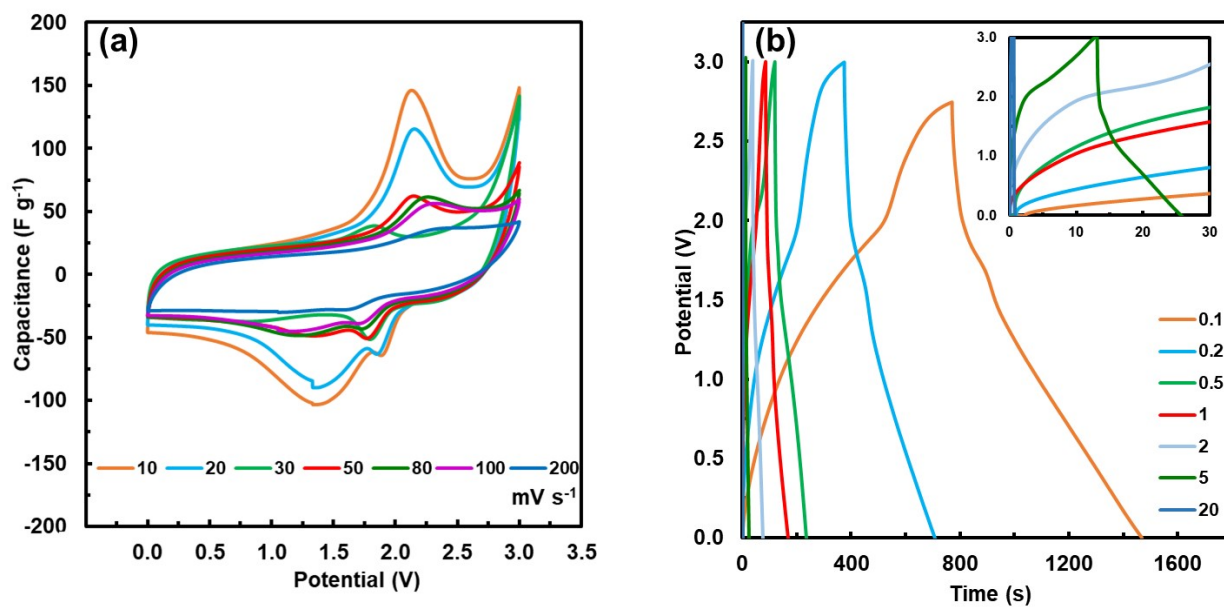

**Figure S6.** (a) CV curves of MXene device at different scan rates; (b) GCD curves of MXene device at various current densities.

**References:**

1. Lide, D. R., CRC Handbook of Chemistry and Physics, 84th. Electrochemical Series. CRC Press LLC, **2004**.
2. Yaws, C.L., Thermophysical Properties of Chemicals and Hydrocarbons, 2<sup>nd</sup> edition, Elsevier, **2014**.
3. Hansen, C. M., Hansen Solubility Parameters: A User's Handbook, CRC Press: Hoboken, **2007**.
4. Barton, A. F. M., CRC Handbook of Solubility Parameters and Other Cohesion Parameters, 2<sup>nd</sup> edition, **2017**.
